# Supplementary material for: Effects of Serine or Threonine in the Active Site of Typical 2-Cys Prx on Hyperoxidation Susceptibility and on Chaperone Activity
Source: MDPI journal article supplement (doi:10.3390/antiox10071032), 2021-06-25
Supplement: s1 [file s1]

# Effects of Serine or Threonine in the Active Site of Typical 2-Cys Prx on Hyperoxidation Susceptibility and on Chaperone Activity

## Supplementary Material

Carlos A. Tairum Jr.<sup>1,2§</sup>, Melina Cardoso Santos<sup>1§</sup>, Carlos Alexandre Breyer<sup>1§</sup>, Ana Laura Pires de Oliveira<sup>1</sup>, Vitoria Isabela Montanhero Cabrera<sup>1</sup>, Guilherme Toledo-Silva<sup>3</sup>, Gustavo Maruyama Mori<sup>4</sup>, Marcos Hikari Toyama<sup>1</sup>, Luis Eduardo Soares Netto<sup>2</sup> and Marcos Antonio de Oliveira<sup>1\*</sup>

1 Instituto de Biociências, Universidade Estadual Paulista, UNESP, São Vicente, SP, Brazil.

2 Departamento de Genética e Biologia Evolutiva, Instituto de Biociências, Universidade de São Paulo, São Paulo, SP, Brazil.

3 Laboratório de Biomarcadores de Contaminação Aquática e Imunoquímica, Departamento de Bioquímica, Universidade Federal de Santa Catarina, Florianópolis, SC, Brazil.

4 Laboratório de Ecologia Molecular, Instituto de Biociências, Universidade Estadual Paulista, UNESP, São Vicente, SP, Brazil.

§ These authors contributed equally to this work.

\* Correspondence: Marcos A. de Oliveira – [marcos.a.oliveira@unesp.br](mailto:marcos.a.oliveira@unesp.br); Luis E.S. Netto – [nettoles@ib.usp.br](mailto:nettoles@ib.usp.br)

**Table S1. Conservation of hyperoxidation resistance motifs in typical 2-Cys peroxiredoxins isoforms.** The hyperoxidation resistance motifs in enzymes containing Thr or Ser in catalytic triad from bacteria, yeast and human. In gray lines are highlighted the enzymes used in this work.

| Protein         | Motif A region D(N/G)H(S/G) | Motif B region T(S/T) |
|-----------------|-----------------------------|-----------------------|
| AhpC_C.j. (Thr) | KGEA                        | TA                    |
| AhpC_P.a. (Thr) | NGHG                        | TT                    |
| AhpC_S.t. (Thr) | DGHG                        | TT                    |
| AhpC_Y.p. (Thr) | HGEA                        | KQ                    |
| AhpC_B.a. (Ser) | DGQA                        | TA                    |
| AhpC_B.s. (Ser) | EGHG                        | SS                    |
| AhpC_E.f. (Ser) | ENHA                        | NA                    |
| AhpC_S.e. (Ser) | NGHG                        | ST                    |
| Tsa1_S.c (Thr)  | EGEA                        | NS                    |
| Tsa2_S.c (Ser)  | DGEA                        | NS                    |
| Prx1_H.s. (Thr) | DNHS                        | KA                    |
| Prx2_H.s. (Thr) | NGQA                        | TS                    |
| Prx3_H.s. (Thr) | DNHS                        | TS                    |
| Prx4_H.s. (Thr) | DNQS                        | TS                    |

Abbreviations and Uniprot code: AhpC\_C.j.= *Campylobacter jejuni* (Q0PBH5); AhpC\_P.a. = *P. aeruginosa* (Q02UU0T); AhpC\_S.t. = *Salmonella typhimurium* (P0A251); AhpC\_Y.p. = *Yersinia pestis* (Q0WC89); AhpC\_B.c. = *Bacillus cereus* var. *anthracis* (D8GYV3); AhpC\_B.s. = *Bacillus subtilis* (P80239); AhpC\_E.f. = *Enterococcus faecalis* (O30738) AhpC\_S.e. = *S. epidermidis* (Q8CMQ2); Tsa1\_S.c. = *S. cerevisiae* (P34760); Tsa2\_S.c. = *S. cerevisiae* (Q04120); Prx1\_H.s. = *Homo sapiens* (Q06830); Prx2\_H.s. = *H. sapiens* (P32119); Prx3\_H.s. = *H. sapiens* (P30048) and Prx4\_H.s. = *H. sapiens* (Q13162).

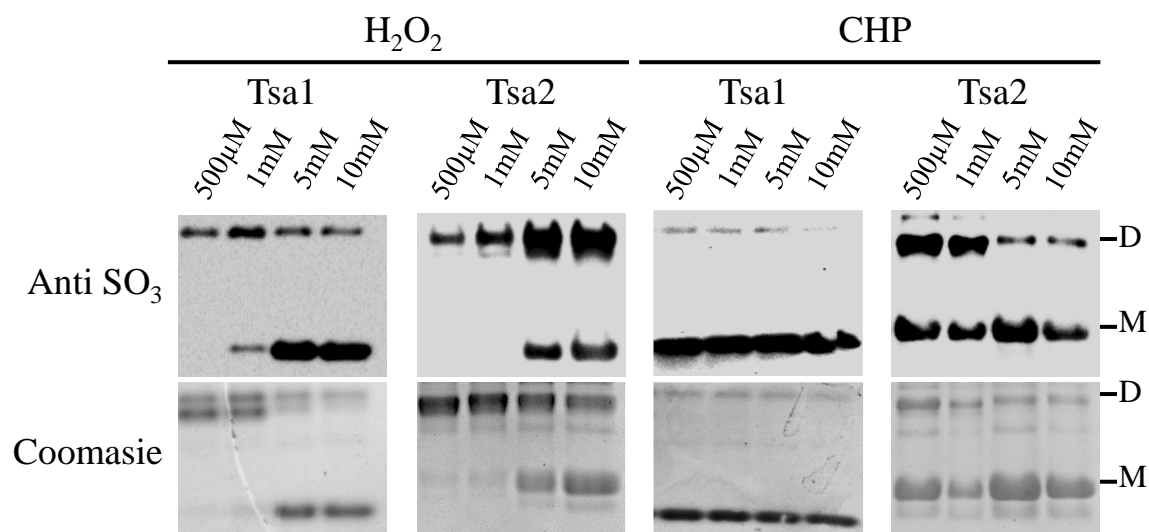

**Figure S1.** Western blot to confirm C<sub>P</sub> hyperoxidation of Tsa1 and Tsa2. The anti- SO<sub>3</sub> antibody were used to verify if Tsa1 and Tsa2 were being hyperoxidized after NADPH assay with growing concentrations of H<sub>2</sub>O<sub>2</sub> or CHP (500 μM, 1 mM, 5 mM and 10 mM) (upper panels). SDS-PAGE colored by Coomassie blue are presented in lower panel as loading control. The legends at the right side of the figures are: M = monomer and D = dimer.

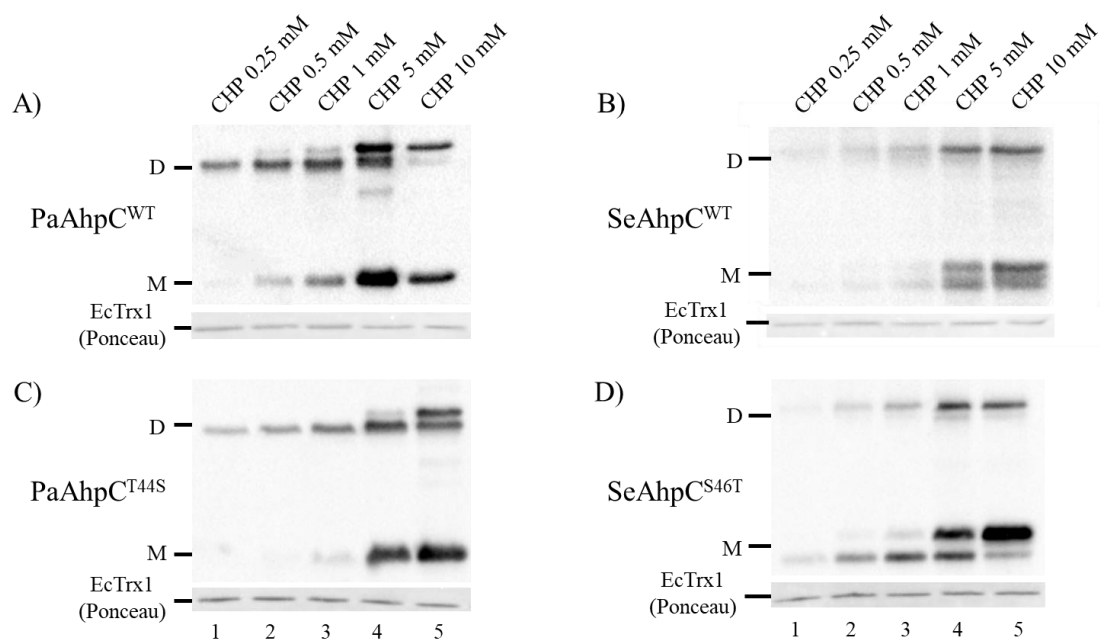

**Figure S2.** Evaluation of AhpC hyperoxidation by western blotting. The results of the experiments were carried out in the presence of PaAhpC (A), SeAhpC (B), PaAhpC<sup>T44S</sup> (C) or SeAhpC<sup>S46T</sup> (D) (3  $\mu$ M), EcTrx1 (6  $\mu$ M), EcTrxR (0.9  $\mu$ M), NADPH (1 mM), sodium azide (100  $\mu$ M) and increasing concentrations of CHP (0.25 mM, 0.5 mM, 1 mM, 5 mM and 10 mM, lanes 1-5, respectively) treated for 10 minutes at 37°C. The membranes were incubated with the anti-PRDX-SO<sub>3</sub> polyclonal primary antibody (AbFrontier) for 2 hours at room temperature and revealed using the ChemiDoc™ MP Imaging System photodocumentator (Bio-Rad). D = dimers; M = monomers.
